# Supplementary material for: STAT1 Hyperphosphorylation and Defective IL12R/IL23R Signaling Underlie Defective Immunity in Autosomal Dominant Chronic Mucocutaneous Candidiasis
Source: PLoS One. 2011 Dec 14;6(12):e29248. doi: 10.1371/journal.pone.0029248 (PMC3237610; doi:10.1371/journal.pone.0029248)

**Supplementary information submitted along with the following manuscript:**

**STAT1 hyperphosphorylation and defective IL12R/IL23R signaling underlie defective immunity in autosomal dominant chronic mucocutaneous candidiasis**

Sanne P. Smeekens1,4,*, Theo S. Plantinga1,4,*, Frank L. van de Veerdonk1,4,*, Bas Heinhuis3, Alexander Hoischen2, Leo A.B. Joosten1,4, Peter Arkwright5, Andrew Gennery6, Bart Jan Kullberg1,4, Joris A. Veltman2, Desa Lilic6 , Jos W.M. van der Meer1,4,#, Mihai G. Netea#1,4,@

**Supplemental Figure 1. STAT1 expression in transfected CD4+ T-cells.**

STAT1 mRNA expression in CD4+ T cells untransfected or transfected with wild-type or mutant STAT1 plasmid. Cells were left unstimulated or stimulated with IFN-γ for 1 hour.


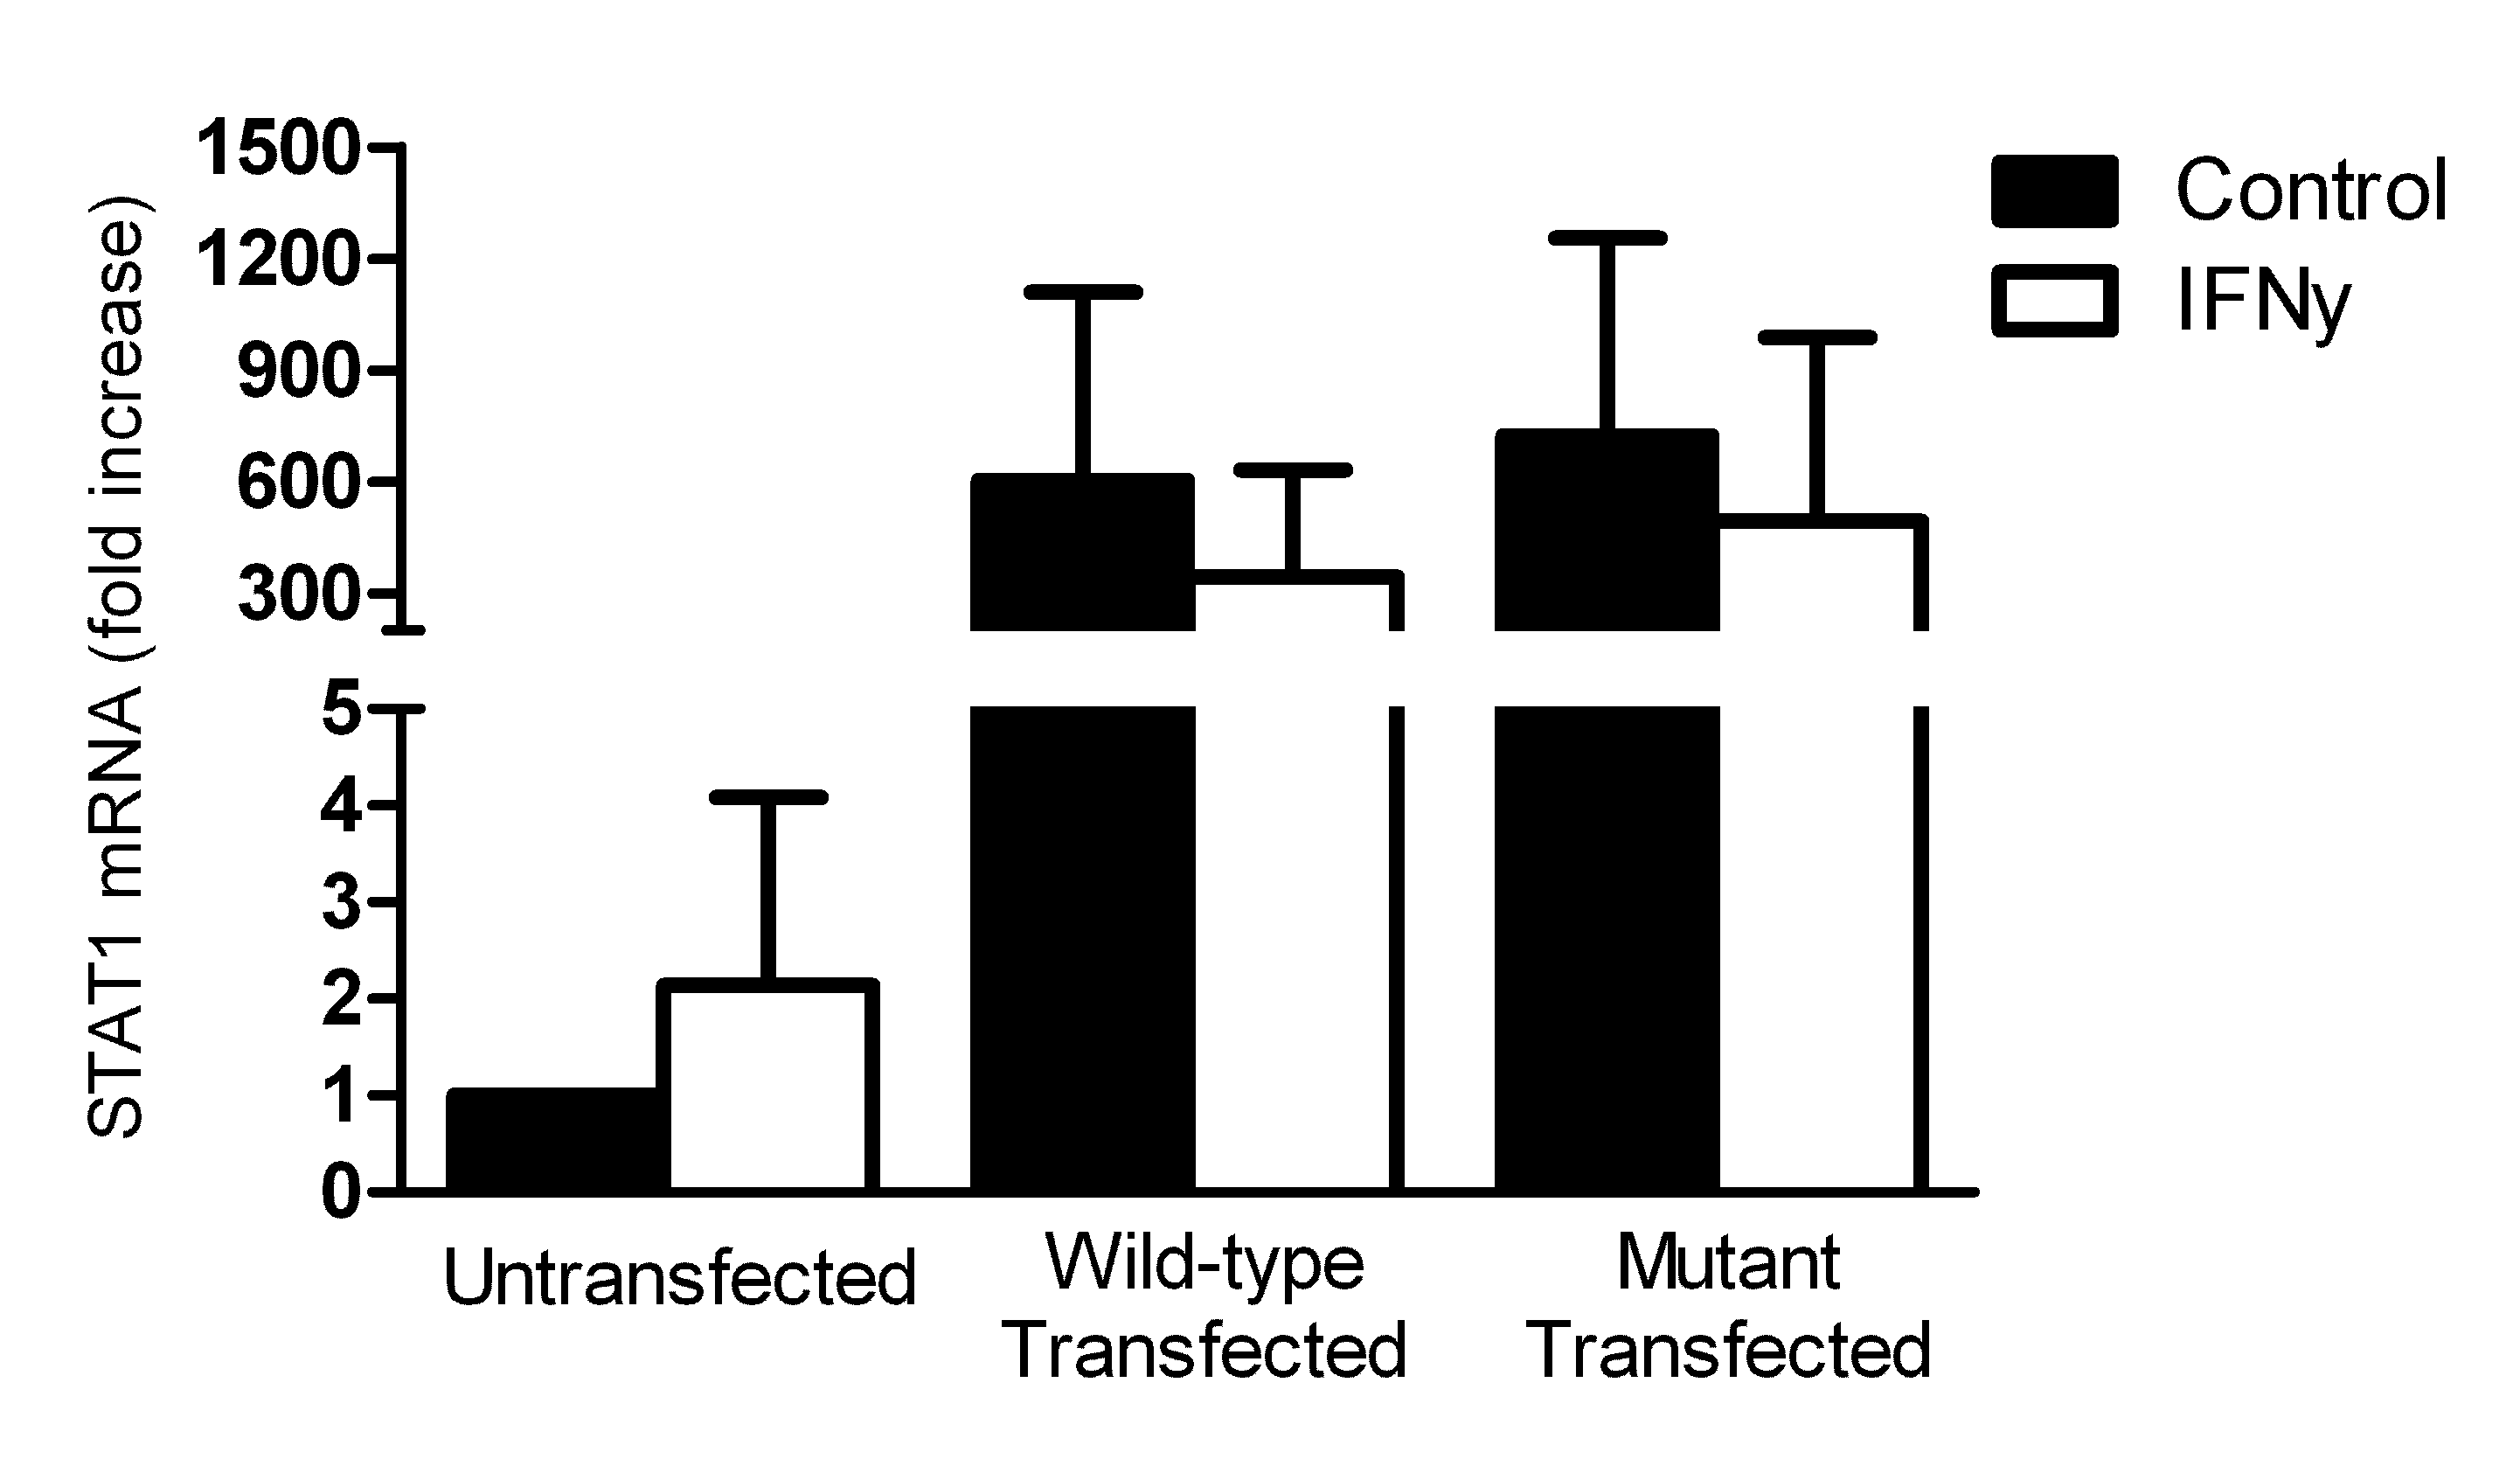

Supplement: Figure S1 — STAT1 expression in transfected CD4+ T-cells. STAT1 mRNA expression in CD4+ T cells untransfected or transfected with wild-type or mutant STAT1 plasmid. Cells were left unstimulated or stimulated with IFN-γ for 1 hour. (DOC) [file pone.0029248.s001.doc]
